# Supplementary material
Source: PubMed Central journal article supplement (PMC6423957)
Supplement: NIHMS1011978-supplement-Supplementary_Material.pdf [file NIHMS1011978-supplement-Supplementary_Material.pdf]

Received XXXX

(www.interscience.wiley.com) DOI: 10.1002/sim.0000

# Likelihood-based analysis of outcome dependent sampling designs with longitudinal data: supplementary materials

Leila R. Zelnick<sup>a\*</sup>, Jonathan S. Schildcrout<sup>b</sup>, and Patrick J. Heagerty<sup>c</sup>

---

---

<sup>a</sup> Department of Medicine, University of Washington, Seattle, WA, 98195, USA

<sup>b</sup> Department of Biostatistics, Vanderbilt School of Medicine, Nashville, TN, 37203, USA

<sup>c</sup> Department of Biostatistics, University of Washington, Seattle, WA, 98195, USA

\* Correspondence to: Department of Medicine, University of Washington, Seattle, WA, 98195, USA. Email: lzelnick@uw.edu

---

## Appendix A: Likelihood-based estimator using subsampled subjects only and with covariates

The likelihood  $SO,WC$  (Equation 4) differs from that of likelihood  $SO,NC$  (Equation 3) by the second term in Equation 5. Without loss of generality, suppose  $M_i$  is a binary marker. Define  $a_0 = AC_0(M_i = 0, \mathbf{T}_i; \boldsymbol{\theta})$  and  $a_1 = AC_0(M_i = 1, \mathbf{T}_i; \boldsymbol{\theta})$ . Under a complete and balanced design,  $P(M_i = m_i, \mathbf{T}_i; \boldsymbol{\Gamma}) = P(M_i = m_i; \boldsymbol{\Gamma})$  and  $\mathbb{E}_{M_i|\mathbf{T}_i}[AC_0(M_i, \mathbf{T}_i)] = \mathbb{E}_{M_i}[AC_0(M_i, \mathbf{T}_i)]$ , and the  $i$ th person's ascertainment correction contribution to the likelihood (Equation 5 in main text) can be written as follows:

$$\begin{aligned}
 \frac{AC_0(M_i, \mathbf{T}_i; \boldsymbol{\theta}) \cdot P(M_i = m_i, \mathbf{T}_i; \boldsymbol{\Gamma})}{\mathbb{E}_{M_i|\mathbf{T}_i}[AC_0(M_i, \mathbf{T}_i; \boldsymbol{\theta})]} &= \frac{AC_0(M_i, \mathbf{T}_i; \boldsymbol{\theta}) \cdot P(M_i = m_i; \boldsymbol{\Gamma})}{\mathbb{E}_{M_i}[AC_0(M_i, \mathbf{T}_i; \boldsymbol{\theta})]} \\
 &= \frac{a_1^m a_0^{1-m} \cdot p^m (1-p)^{1-m}}{p a_1 + (1-p) a_0} \\
 &= \frac{(a_1 p)^m (a_0 (1-p))^{1-m}}{p a_1 + (1-p) a_0} \\
 &= \frac{\left(\frac{a_1}{a_0} p\right)^m (1-p)^{1-m}}{\frac{a_1}{a_0} p + 1 - p} \\
 &= \frac{\frac{a_0}{a_1 p} \cdot \left(\frac{a_1}{a_0} p\right)^m (1-p)^{1-m}}{\frac{a_1}{a_0} p + 1 - p} \\
 &= \left(\frac{1}{1 + \frac{a_0}{a_1} \cdot \frac{1-p}{p}}\right)^m \left(\frac{\frac{a_0}{a_1} \cdot \frac{1-p}{p}}{1 + \frac{a_0}{a_1} \cdot \frac{1-p}{p}}\right)^{1-m} \\
 &= \xi^m (1 - \xi)^{1-m},
 \end{aligned}$$

where  $\xi = \left(\frac{1}{1 + \frac{a_0}{a_1} \cdot \frac{1-p}{p}}\right)$ . For balanced and complete designs,  $a_0$  and  $a_1$  do not vary across subjects, so this term's contribution to likelihood  $SO,WC$  (Equation 4) can be seen as a reparameterization of the marginal distribution of  $M$ , which contains no information about  $\boldsymbol{\theta}$ . Thus, adding this term to the likelihood  $SO,NC$  (Equation 3) will add no information to the resulting inference, and in fact will yield the same estimate, up to the chosen tolerance of the Newton-Raphson algorithm.

*Supplementary Table 1*

**Supplementary Table 1.** Percent bias and relative efficiency for likelihood-based ODS estimators, under low subject-to-subject heterogeneity. Results shown summarize 1000 replications with  $N = 1000$ ,  $\beta = (\beta_0, \beta_T, \beta_M, \beta_{M \times T}) = (10, -0.25, -0.75, 0.5)$ ,  $\sigma_{b_0}^2 = 4$ ,  $\sigma_{b_1}^2 = 0.25$ ,  $\sigma_e^2 = 1$ , and  $\rho = 0$ .  $N_S = 250$  subjects were subsampled on average. Percent bias defined as the  $100 \times$  the difference between estimator mean and parameter value, divided by parameter value, and relative efficiency for an estimator is defined as the ratio of variances between a random sample of  $N_S = 250$  and the estimator. NA for percent bias indicates that percent bias is undefined.

| Design        | Estimator           | $\beta_0$ | $\beta_T$ | $\beta_M$ | $\beta_{M \times T}$ | $\gamma_1$ | $\gamma_2$ | $\gamma_3$ | $\gamma_4$ |
|---------------|---------------------|-----------|-----------|-----------|----------------------|------------|------------|------------|------------|
|               | Likelihood analysis |           |           |           |                      |            |            |            |            |
| Full cohort   | Standard            | 0[3.91]   | 0[3.88]   | -1[3.98]  | 0[4.02]              | 0[4.14]    | NA[4.39]   | 0[4.14]    | NA[3.71]   |
| Random sample | Standard            | 0[1.00]   | 1[1.00]   | 0[1.00]   | -1[1.00]             | -2[1.00]   | NA[1.00]   | -1[1.00]   | NA[1.00]   |
| Intercept     | <i>SO, NC</i>       | 0[1.65]   | -1[1.00]  | 1[1.48]   | -1[1.07]             | -1[1.52]   | NA[1.87]   | 1[0.95]    | NA[0.92]   |
|               | <i>SO, WC</i>       | 0[1.65]   | -1[1.00]  | 1[1.48]   | -1[1.07]             | -1[1.52]   | NA[1.87]   | 1[0.95]    | NA[0.92]   |
|               | <i>SU, NC</i>       | 0[2.96]   | 0[1.44]   | 2[1.54]   | 0[1.14]              | 0[3.72]    | NA[3.69]   | 0[2.43]    | NA[3.71]   |
|               | <i>SU, NC + PI</i>  | 0[3.42]   | 0[2.56]   | 2[1.56]   | -1[1.20]             | 0[3.72]    | NA[3.89]   | 0[2.87]    | NA[3.71]   |
|               | <i>SU, WC</i>       | 0[3.44]   | 0[2.86]   | 2[1.52]   | 0[1.18]              | 0[3.73]    | NA[3.89]   | 0[2.94]    | NA[3.71]   |
|               | <i>UC</i>           | 0[3.43]   | 0[2.86]   | 2[1.51]   | 0[1.18]              | 0[3.83]    | NA[3.90]   | 0[2.94]    | NA[3.70]   |
| Slope         | <i>SO, NC</i>       | 0[1.08]   | 0[1.80]   | 2[1.17]   | 2[1.37]              | -1[0.96]   | NA[1.70]   | 1[1.36]    | NA[1.03]   |
|               | <i>SO, WC</i>       | 0[1.08]   | 0[1.80]   | 2[1.17]   | 2[1.37]              | -1[0.96]   | NA[1.70]   | 1[1.36]    | NA[1.03]   |
|               | <i>SU, NC</i>       | 0[2.69]   | 0[2.24]   | 3[1.10]   | 2[1.39]              | 0[3.65]    | NA[3.50]   | 0[2.57]    | NA[3.71]   |
|               | <i>SU, NC + PI</i>  | 0[3.14]   | 0[3.16]   | 2[1.18]   | 1[1.46]              | 0[3.83]    | NA[3.65]   | 0[3.06]    | NA[3.71]   |
|               | <i>SU, WC</i>       | 0[3.16]   | 0[3.42]   | 3[1.07]   | 2[1.42]              | 0[3.82]    | NA[3.71]   | 0[3.14]    | NA[3.71]   |
|               | <i>UC</i>           | 0[3.19]   | 0[3.43]   | 3[1.15]   | 2[1.48]              | 0[3.85]    | NA[3.75]   | 0[3.33]    | NA[3.71]   |

Supplementary Table 2

**Supplementary Table 2.** Percent bias and relative efficiency for likelihood-based ODS estimators, under high subject-to-subject heterogeneity. Results shown summarize 1000 replications with  $N = 1000$ ,  $\beta = (\beta_0, \beta_T, \beta_M, \beta_{M \times T}) = (10, -0.25, -0.75, 0.5)$ ,  $\sigma_{b_0}^2 = 4$ ,  $\sigma_{b_1}^2 = 4$ ,  $\sigma_e^2 = 4$ , and  $\rho = 0$ .  $N_S = 250$  subjects were subsampled on average. Percent bias defined as the  $100 \times$  the difference between estimator mean and parameter value, divided by parameter value, and relative efficiency for an estimator is defined as the ratio of variances between a random sample of  $N_S = 250$  and the estimator. NA for percent bias indicates that percent bias is undefined.

| Design        | Estimator           |  | $\beta_0$ | $\beta_T$ | $\beta_M$ | $\beta_{M \times T}$ | $\gamma_1$ | $\gamma_2$ | $\gamma_3$ | $\gamma_4$ |
|---------------|---------------------|--|-----------|-----------|-----------|----------------------|------------|------------|------------|------------|
|               | Likelihood analysis |  |           |           |           |                      |            |            |            |            |
| Full cohort   | Standard            |  | 0[3.98]   | 0[3.97]   | 0[4.09]   | 0[4.46]              | -1[4.39]   | NA[4.61]   | 0[4.09]    | 0[3.90]    |
| Random sample | Standard            |  | 0[1.00]   | 1[1.00]   | 0[1.00]   | -1[1.00]             | -2[1.00]   | NA[1.00]   | -1[1.00]   | 0[1.00]    |
| Intercept     | $SO + NC$           |  | 0[1.62]   | 1[0.97]   | 0[1.72]   | 2[1.15]              | -1[1.38]   | NA[1.94]   | -1[1.01]   | 0[1.02]    |
|               | $SO, WC$            |  | 0[1.62]   | 1[0.97]   | 0[1.72]   | 2[1.15]              | -1[1.38]   | NA[1.94]   | -1[1.01]   | 0[1.02]    |
|               | $SU, NC$            |  | 0[2.33]   | 6[1.53]   | 0[1.61]   | 2[1.03]              | -1[3.70]   | NA[4.16]   | -1[3.73]   | 0[3.88]    |
|               | $SU, NC + PI$       |  | 0[3.32]   | -1[2.28]  | -1[1.72]  | 2[1.11]              | -1[3.80]   | NA[4.28]   | 0[3.92]    | 0[3.89]    |
|               | $SU, WC$            |  | 0[3.39]   | 0[2.98]   | -1[1.69]  | 2[1.08]              | -1[3.82]   | NA[4.30]   | 0[3.93]    | 0[3.89]    |
| Slope         | $UC$                |  | 0[3.38]   | 0[2.97]   | -1[1.71]  | 2[1.08]              | -1[4.01]   | NA[4.33]   | 0[3.92]    | 0[3.89]    |
|               | $SO, NC$            |  | 0[0.96]   | 0[1.68]   | 0[1.07]   | 2[1.84]              | -3[1.12]   | NA[1.89]   | -1[1.40]   | 0[1.06]    |
|               | $SO, WC$            |  | 0[0.96]   | 0[1.68]   | 0[1.07]   | 2[1.84]              | -3[1.12]   | NA[1.89]   | -1[1.40]   | 0[1.06]    |
|               | $SU, NC$            |  | 0[1.55]   | 4[2.37]   | 0[0.95]   | 1[1.74]              | -1[4.02]   | NA[4.32]   | 0[3.39]    | 0[3.88]    |
|               | $SU, NC + PI$       |  | 0[2.96]   | 0[3.53]   | 0[1.07]   | 2[1.84]              | -1[4.18]   | NA[4.36]   | 0[3.43]    | 0[3.89]    |
|               | $SU, WC$            |  | 0[2.96]   | 0[3.55]   | 1[1.05]   | 2[1.84]              | -1[4.18]   | NA[4.39]   | 0[3.43]    | 0[3.89]    |
|               | $UC$                |  | 0[2.97]   | 0[3.56]   | 0[1.07]   | 2[1.86]              | -1[4.17]   | NA[4.40]   | 0[3.69]    | 0[3.89]    |

*Supplementary Table 3*

**Supplementary Table 3.** Percent bias and relative efficiency for time-specific predicted means and predicted difference in means, under high subject-to-subject heterogeneity. Results shown summarize 1000 replications with  $N = 1000$ ,  $\beta = (\beta_0, \beta_T, \beta_M, \beta_{M \times T}) = (10, -0.25, -0.75, 0.5)$ ,  $\sigma_{b_0}^2 = 4$ ,  $\sigma_{b_1}^2 = 4$ ,  $\sigma_e^2 = 4$ , and  $\rho = 0$ .  $N_S = 250$  subjects were subsampled on average. Percent bias defined as the  $100 \times$  the difference between estimator mean and parameter value, divided by parameter value, and relative efficiency for an estimator is defined as the ratio of variances between a random sample of  $N_S = 250$  and the estimator.

| <b>Estimator</b>                   | $\mu_0(1)$ | $\mu_1(1)$ | $\Delta_1$ | $\mu_0(6)$ | $\mu_1(6)$ | $\Delta_6$ |
|------------------------------------|------------|------------|------------|------------|------------|------------|
| <i>SO, NC<sub>int</sub></i>        | 0 [1.36]   | 0 [1.41]   | -4 [1.37]  | 0 [0.99]   | 0 [1.16]   | 2 [1.13]   |
| <i>SO, WC<sub>int</sub></i>        | 0 [1.36]   | 0 [1.41]   | -4 [1.37]  | 0 [0.99]   | 0 [1.16]   | 2 [1.13]   |
| <i>SU, NC<sub>int</sub></i>        | 0 [2.20]   | 0 [1.38]   | -4 [1.23]  | 0 [1.59]   | 0 [1.12]   | 2 [1.00]   |
| <i>SU, NC + PI<sub>int</sub></i>   | 0 [3.46]   | 0 [1.44]   | -5 [1.34]  | -1 [2.99]  | 0 [1.17]   | 3 [1.09]   |
| <i>SU, WC<sub>int</sub></i>        | 0 [3.49]   | 0 [1.40]   | -5 [1.32]  | 0 [3.07]   | 0 [1.14]   | 2 [1.06]   |
| <i>UC<sub>int</sub></i>            | 0 [3.50]   | 0 [1.40]   | -6 [1.32]  | 0 [3.07]   | 1 [1.14]   | 3 [1.06]   |
| <i>SO, NC<sub>slope</sub></i>      | 0 [1.14]   | 0 [1.13]   | -4 [1.11]  | 0 [1.65]   | 0 [1.74]   | 2 [1.71]   |
| <i>SO, WC<sub>slope</sub></i>      | 0 [1.14]   | 0 [1.13]   | -4 [1.11]  | 0 [1.65]   | 0 [1.74]   | 2 [1.71]   |
| <i>SU, NC<sub>slope</sub></i>      | 0 [1.90]   | 0 [1.13]   | -2 [1.00]  | -1 [2.43]  | 0 [1.74]   | 2 [1.60]   |
| <i>SU, NC + PI<sub>slope</sub></i> | 0 [3.24]   | 0 [1.19]   | -3 [1.09]  | 0 [3.57]   | 0 [1.77]   | 2 [1.70]   |
| <i>SU, WC<sub>slope</sub></i>      | 0 [3.22]   | 0 [1.18]   | -2 [1.08]  | 0 [3.58]   | 0 [1.78]   | 3 [1.70]   |
| <i>UC<sub>slope</sub></i>          | 0 [3.23]   | 0 [1.21]   | -3 [1.11]  | 0 [3.58]   | 0 [1.80]   | 2 [1.72]   |

Supplementary Table 4

**Supplementary Table 4.** Percent bias and relative efficiency for time-specific predicted means and predicted difference in means, under low subject-to-subject heterogeneity. Results shown summarize 1000 replications with  $N = 1000$ ,  $\beta = (\beta_0, \beta_T, \beta_M, \beta_{M \times T}) = (10, -0.25, -0.75, 0.5)$ ,  $\sigma_{b_0}^2 = 4$ ,  $\sigma_{b_1}^2 = 0.25$ ,  $\sigma_e^2 = 1$ , and  $\rho = 0$ .  $N_S = 250$  subjects were subsampled on average. Percent bias defined as the  $100 \times$  the difference between estimator mean and parameter value, divided by parameter value, and relative efficiency for an estimator is defined as the ratio of variances between a random sample of  $N_S = 250$  and the estimator.

| Estimator                          | $\mu_0(1)$ | $\mu_1(1)$ | $\Delta_1$ | $\mu_0(6)$ | $\mu_1(6)$ | $\Delta_6$ |
|------------------------------------|------------|------------|------------|------------|------------|------------|
| <i>SO, NC<sub>int</sub></i>        | 0 [1.62]   | 0 [1.46]   | 5 [1.46]   | 0 [1.15]   | 0 [1.16]   | -1 [1.15]  |
| <i>SO, WC<sub>int</sub></i>        | 0 [1.62]   | 0 [1.46]   | 5 [1.46]   | 0 [1.15]   | 0 [1.16]   | -1 [1.15]  |
| <i>SU, NC<sub>int</sub></i>        | 0 [3.24]   | 0 [1.54]   | 5 [1.49]   | 0 [2.02]   | 0 [1.15]   | 0 [1.18]   |
| <i>SU, NC + PI<sub>int</sub></i>   | 0 [3.47]   | 0 [1.57]   | 6 [1.54]   | 0 [2.91]   | 0 [1.32]   | -2 [1.27]  |
| <i>SU, WC<sub>int</sub></i>        | 0 [3.48]   | 0 [1.52]   | 6 [1.50]   | 0 [3.13]   | 0 [1.29]   | -1 [1.23]  |
| <i>UC<sub>int</sub></i>            | 0 [3.48]   | 0 [1.51]   | 5 [1.49]   | 0 [3.13]   | 0 [1.29]   | -1 [1.23]  |
| <i>SO, NC<sub>slope</sub></i>      | 0 [1.10]   | 0 [1.17]   | 1 [1.21]   | 0 [1.53]   | 0 [1.31]   | 2 [1.40]   |
| <i>SO, WC<sub>slope</sub></i>      | 0 [1.10]   | 0 [1.17]   | 1 [1.21]   | 0 [1.53]   | 0 [1.31]   | 2 [1.40]   |
| <i>SU, NC<sub>slope</sub></i>      | 0 [2.94]   | 0 [1.17]   | 4 [1.12]   | 0 [2.84]   | 0 [1.28]   | 2 [1.34]   |
| <i>SU, NC + PI<sub>slope</sub></i> | 0 [3.26]   | 0 [1.26]   | 4 [1.21]   | 0 [3.42]   | 0 [1.42]   | 1 [1.45]   |
| <i>SU, WC<sub>slope</sub></i>      | 0 [3.24]   | 0 [1.16]   | 6 [1.12]   | 0 [3.53]   | 0 [1.40]   | 2 [1.42]   |
| <i>UC<sub>slope</sub></i>          | 0 [3.30]   | 0 [1.21]   | 4 [1.18]   | 0 [3.59]   | 0 [1.41]   | 1 [1.44]   |

Supplementary Table 5

**Supplementary Table 5.** Baseline characteristics of Cystic Fibrosis Foundation Registry cohort (N = 3,141).

| Characteristic                       | Value       |
|--------------------------------------|-------------|
| N                                    | 3,141       |
| Age (years)                          | 8.8 (1.1)   |
| Male sex, N (%)                      | 1584 (50.4) |
| Height (cm)                          | 125.4 (8.4) |
| Weight (kg)                          | 25.9 (6.0)  |
| Presence of <i>S. aureus</i> , N (%) | 2206 (70.2) |
| $FEV_1$ (L)                          | 1.4 (0.4)   |

Values are mean (SD), except as noted.

Supplementary Figure 1

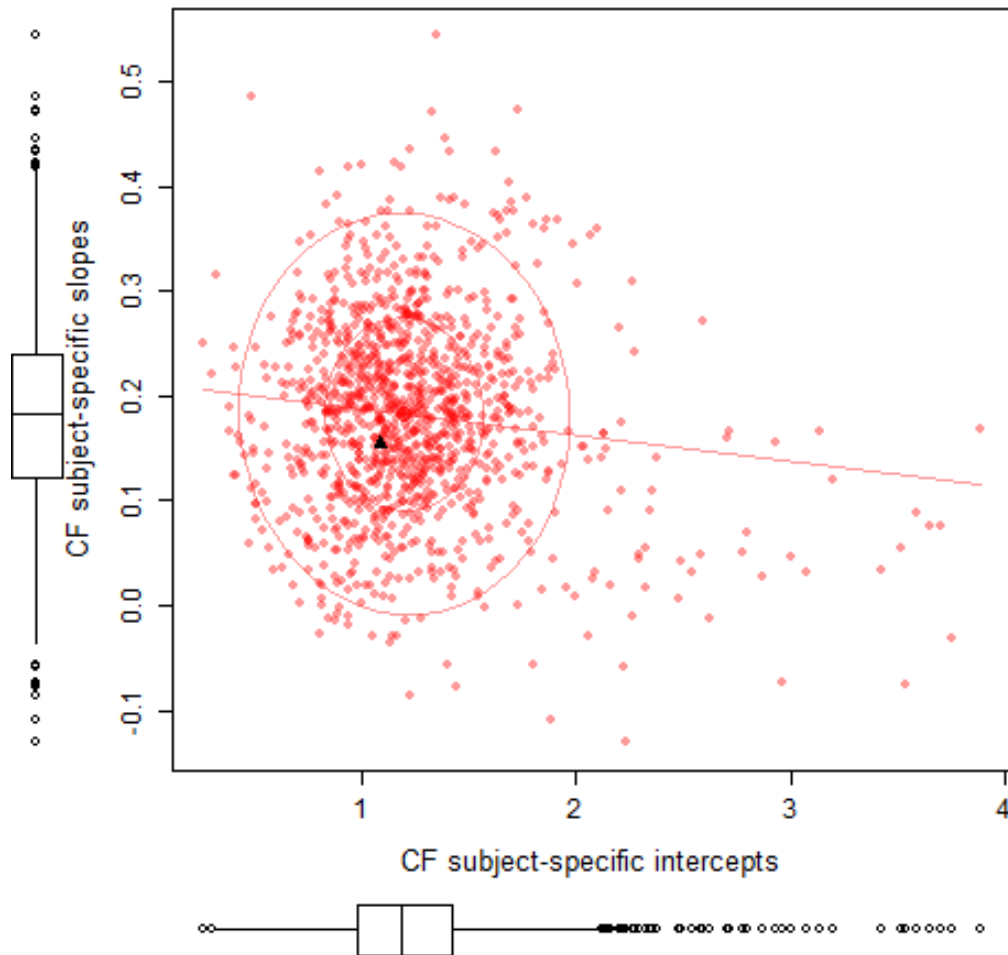

**Supplementary Figure 1.** Subject-specific intercepts and slopes resulting from regressing a CF patient's  $FEV_1$  longitudinal outcome on time. The distribution of intercepts and slopes do not appear to be clearly inconsistent with bivariate normality.
